# Supplementary material for: A new integrated method for tissue extracellular vesicle enrichment and proteome profiling
Source: Royal Society of Chemistry journal article supplement (doi:10.1039/d2ra06185f), 2022-01-01
Supplement: d2ra06185f2.pdf [file d2ra06185f2.pdf]

## Electronic Supplementary Information

# A new integrated method for tissue extracellular vesicle enrichment and proteome profiling

Miaomiao Zhang<sup>a,b</sup>, Tong Liu<sup>b</sup>, Zhuokun Du<sup>b</sup>, Hang Li<sup>c,b,\*</sup>, Weijie Qin<sup>a,b,\*</sup>

<sup>a</sup> Department of Immunology, Medical College of Qingdao University, Qingdao, Shandong 266071, PR China

<sup>b</sup> National Center for Protein Sciences Beijing, State Key Laboratory of Proteomics, Beijing. Proteome Research Center, Beijing Institute of Lifeomics, Beijing 102206, PR China.

<sup>c</sup> Present address: School of Medical Technology, Beijing Institute of Technology, Beijing 100081, PR China.

\*Corresponding Author E-mail:

hang.li@bit.edu.cn (Li H.), aunp\_dna@126.com (Qin W. J.)

## Table of Contents

### 1. Supplementary Figures and Table

|                                                                                                                                       |       |
|---------------------------------------------------------------------------------------------------------------------------------------|-------|
| Figure S1. Separation of liver tissue EV proteins in triplicates by SDS-PAGE (blue-stained).                                          | S2    |
| Figure S2. Box plot showing the intensity of EV proteins detected by all the four methods and by kit-TiO <sub>2</sub> approach alone. | S3    |
| Figure S3. The gene ontology analysis of the identified tissue EV proteins by the kit-TiO <sub>2</sub> series method.                 | S4    |
| Figure S4. The number of EV proteins in cellular compartments of GO analysis for the different extraction methods.                    | S5    |
| Table S1. Differentially expressed proteins of tissue EV from the healthy and HCC mice                                                | S6-S7 |

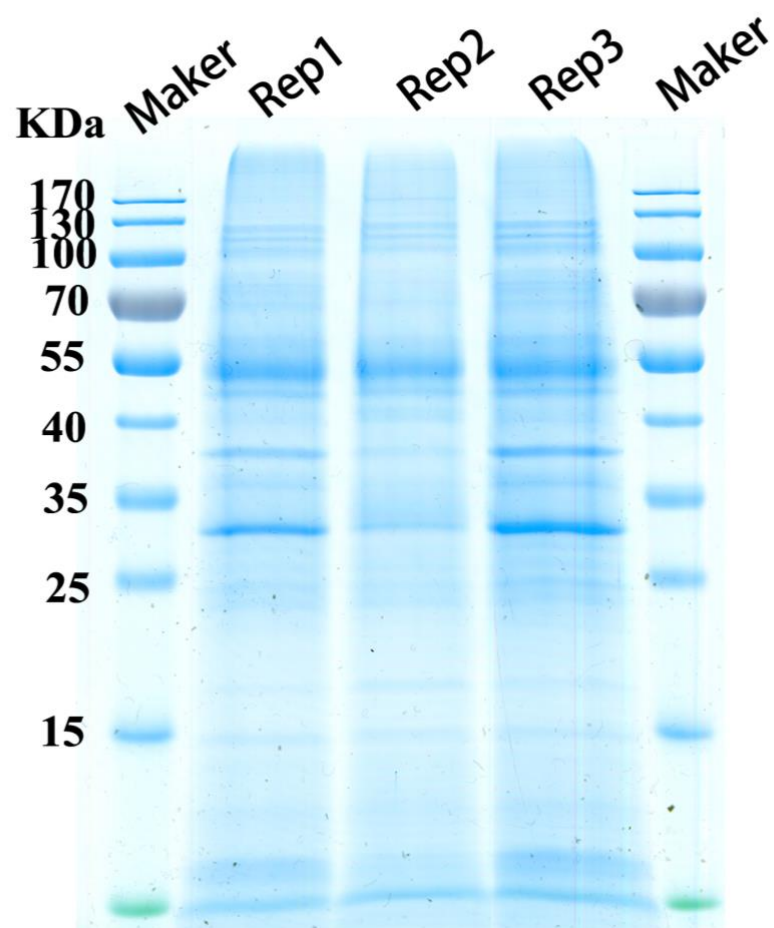

**Figure S1.** Separation of liver tissue EV proteins in triplicates by SDS-PAGE (blue-stained).

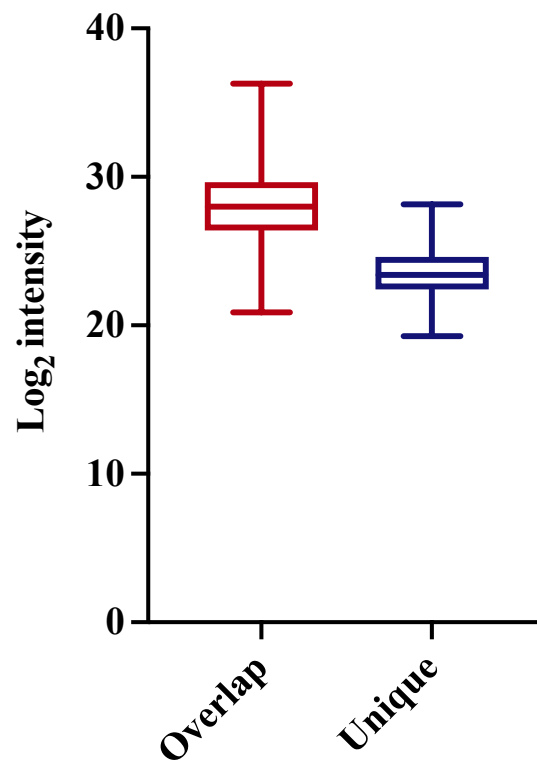

**Figure S2.** Box plot showing the intensity of EV proteins detected by all the four methods and by kit-TiO<sub>2</sub> approach alone.

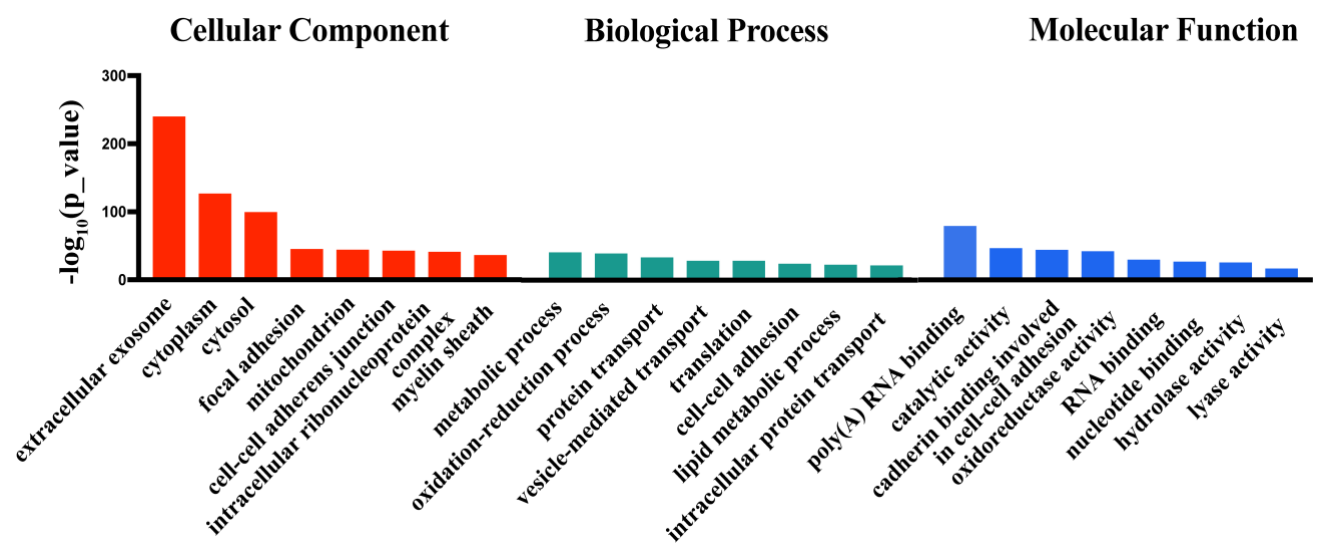

**Figure S3.** The gene ontology analysis of the identified tissue EV proteins by the kit–TiO<sub>2</sub> series method.

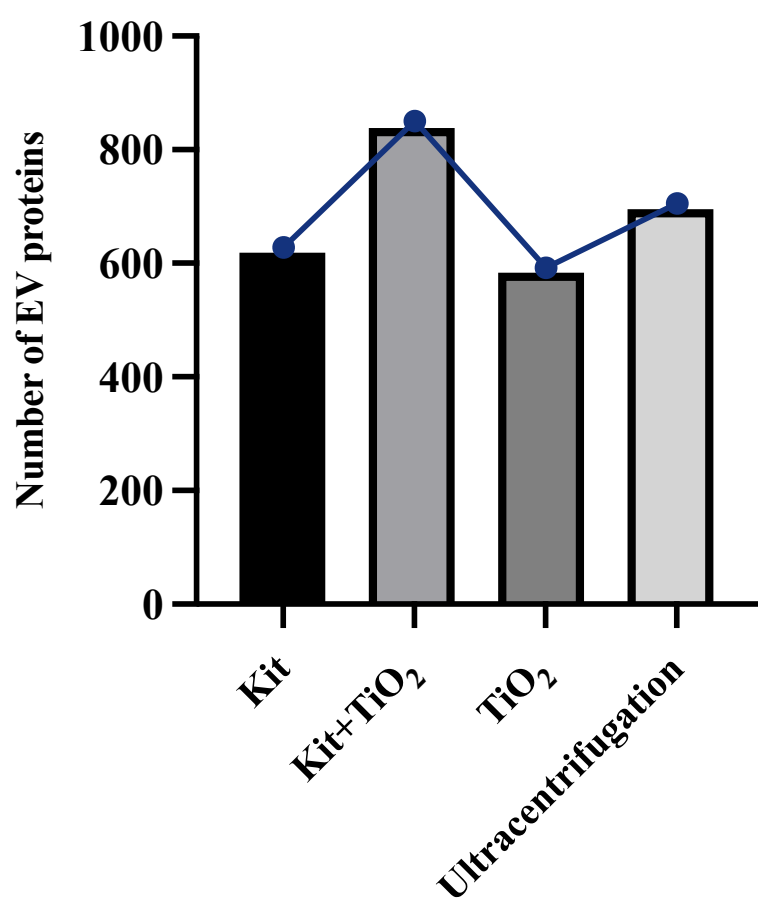

Figure S4. The number of EV proteins in cellular compartments of GO analysis for the different extraction methods.

**Table S1.** differentially expressed proteins of tissue EV from the healthy and HCC Mice

| Uniprot ID | Gene names | logFC    | logCPM   | PValue   | FDR      |
|------------|------------|----------|----------|----------|----------|
| P97500     | Myt1       | 6.576232 | 6.676787 | 2.43E-18 | 2.03E-15 |
| O80358     | FPG1       | 6.471748 | 6.573426 | 7.25E-18 | 3.02E-15 |
| Q3URU2     | Peg3       | 5.760498 | 5.872382 | 3.54E-12 | 9.84E-10 |
| Q80UW5     | Cdc42bpg   | 4.82743  | 5.327343 | 2.07E-06 | 9.06E-05 |
| P04776     | GY1        | 4.721327 | 7.213106 | 3.49E-05 | 0.000939 |
| Q9CWJ9     | Atic       | 3.806736 | 3.991827 | 5.02E-08 | 5.23E-06 |
| Q27IK6     | KIN12D     | 3.707794 | 5.072426 | 0.000198 | 0.003951 |
| P04405     | GY2        | 3.18414  | 8.15941  | 0.004317 | 0.045245 |
| Q8CIE6     | Copa       | 2.320275 | 6.92623  | 0.001219 | 0.015864 |
| Q91YT0     | Ndufv1     | 2.180942 | 8.684168 | 0.000306 | 0.005666 |
| P06801     | Me1        | 1.971252 | 9.851786 | 1.66E-05 | 0.000533 |
| Q8BWP8     | B4gat1     | 1.925424 | 2.955314 | 0.008034 | 0.071964 |
| P09811     | Pygl       | 1.90594  | 11.02188 | 4.10E-05 | 0.001035 |
| Q8K0V4     | Cnot3      | 1.867488 | 7.592016 | 0.001389 | 0.017265 |
| O35639     | Anxa3      | 1.819554 | 7.019045 | 0.003405 | 0.037316 |
| Q9D6J6     | Ndufv2     | 1.808295 | 9.669767 | 0.000374 | 0.0065   |
| P09528     | Fth1       | 1.751346 | 9.531872 | 6.70E-05 | 0.00155  |
| Q99LB7     | Sardh      | 1.732996 | 8.926328 | 0.000614 | 0.009843 |
| P48036     | Anxa5      | 1.659633 | 11.37893 | 9.30E-05 | 0.002094 |
| P67778     | Phb1       | 1.649297 | 12.14927 | 3.93E-05 | 0.001023 |
| P29391     | Ftl1       | 1.626707 | 10.7031  | 6.06E-05 | 0.001443 |
| Q8BWT1     | Acaa2      | 1.596736 | 10.92431 | 0.000375 | 0.0065   |
| O04291     | ATHB-14    | 1.538602 | 10.3154  | 4.67E-05 | 0.001144 |
| Q9D3D9     | Atp5f1d    | 1.52851  | 9.382788 | 0.001146 | 0.01515  |
| P26443     | Glud1      | 1.511104 | 10.57208 | 0.0002   | 0.003951 |
| Q8VC30     | Tkfc       | -1.51858 | 9.559122 | 0.008485 | 0.075195 |
| Q9WVJ2     | Psm13      | -1.53305 | 9.528347 | 0.000362 | 0.0065   |
| Q8K157     | Galm       | -1.82291 | 2.826816 | 0.00633  | 0.05992  |
| Q91WG4     | Elp2       | -1.92713 | 2.90871  | 0.004544 | 0.046135 |
| Q9QUI0     | Rhoa       | -2.05601 | 3.011694 | 0.007245 | 0.066322 |
| P58044     | Idi1       | -2.11684 | 3.060923 | 0.001917 | 0.022815 |
| O54774     | Ap3d1      | -2.15786 | 3.837691 | 0.004345 | 0.045245 |
| Q9CY64     | Blvra      | -2.20043 | 3.12922  | 0.001375 | 0.017265 |
| Q61553     | Fscn1      | -2.21636 | 4.074914 | 0.00538  | 0.053348 |
| Q922H4     | Gmppa      | -2.28484 | 3.198905 | 0.00086  | 0.012547 |
| O08692     | Ngp        | -2.32189 | 6.456339 | 0.001609 | 0.019419 |
| Q91WT9     | Cbs        | -2.34083 | 8.635732 | 2.21E-07 | 1.68E-05 |

| Uniprot ID | Gene names | logFC    | logCPM   | PValue   | FDR      |
|------------|------------|----------|----------|----------|----------|
| P46460     | Nsf        | -2.36294 | 3.264    | 0.000577 | 0.009616 |
| Q9CYH2     | Prxl2a     | -2.3829  | 3.751514 | 0.000797 | 0.011849 |
| Q61543     | Glg1       | -2.54037 | 3.414002 | 0.000219 | 0.00414  |
| P62264     | Rps14      | -2.54801 | 3.420522 | 0.000204 | 0.003951 |
| Q9D819     | Ppa1       | -2.58664 | 4.847157 | 0.003207 | 0.036593 |
| Q80TA6     | Mtmr12     | -2.6011  | 3.465978 | 0.000164 | 0.003511 |
| P47758     | Srprb      | -2.61531 | 3.478189 | 0.000173 | 0.003609 |
| Q9D4H8     | Cul2       | -2.65042 | 3.50842  | 0.000139 | 0.003039 |
| Q501J6     | Ddx17      | -2.88488 | 4.279651 | 1.21E-05 | 0.000439 |
| P26883     | Fkbp1a     | -2.92407 | 3.747416 | 2.87E-05 | 0.000853 |
| Q9EQP6     | Arr3       | -2.9776  | 6.056333 | 3.30E-05 | 0.000916 |
| Q922D8     | Mthfd1     | -2.99898 | 3.813802 | 2.01E-05 | 0.00062  |
| O08600     | Endog      | -3.13708 | 4.914939 | 0.000733 | 0.011104 |
| P63087     | Ppp1cc     | -3.14668 | 3.945803 | 1.33E-05 | 0.000461 |
| Q9CQC6     | Bzw1       | -3.16966 | 3.966469 | 9.75E-06 | 0.000369 |
| O55135     | Eif6       | -3.18406 | 6.222929 | 1.64E-06 | 7.59E-05 |
| P20060     | Hexb       | -3.20593 | 3.999156 | 1.45E-05 | 0.000483 |
| Q64458     | Cyp2c29    | -3.24863 | 5.868282 | 0.000703 | 0.010847 |
| Q9D8L5     | Ccdc91     | -3.29284 | 4.077791 | 4.30E-06 | 0.00017  |
| Q7SIB2     | COL4A1     | -3.60271 | 4.361613 | 8.35E-07 | 4.09E-05 |
| O89112     | Lancl1     | -3.61371 | 4.371775 | 7.14E-07 | 3.72E-05 |
| Q62186     | Ssr4       | -3.64042 | 4.396491 | 2.36E-06 | 9.85E-05 |
| P10605     | Ctsb       | -3.66676 | 4.420888 | 3.18E-05 | 0.000913 |
| Q6WVG3     | Kctd12     | -3.67902 | 4.432254 | 7.13E-07 | 3.72E-05 |
| Q91VS7     | Mgst1      | -3.70778 | 4.458957 | 4.68E-07 | 2.78E-05 |
| Q99L13     | Hibadh     | -3.80537 | 5.306542 | 2.84E-07 | 1.97E-05 |
| P62700     | Ypel5      | -3.84779 | 4.589449 | 3.89E-07 | 2.49E-05 |
| P14431     | H2-Q9      | -4.12981 | 4.854729 | 1.50E-07 | 1.25E-05 |
| Q91W43     | Gldc       | -4.25102 | 4.969649 | 7.27E-08 | 6.73E-06 |
| Q8BMJ2     | Lars1      | -4.36799 | 5.081001 | 3.14E-08 | 3.73E-06 |
| Q9CWG9     | Bloc1s2    | -4.45656 | 5.165596 | 1.93E-08 | 2.67E-06 |
| Q9DCQ2     | Aspdh      | -4.57121 | 5.275438 | 1.17E-08 | 1.94E-06 |
| Q94AY3     | DRIP2      | -4.90504 | 5.597182 | 9.17E-10 | 1.91E-07 |
