# Supplementary figures and images for: A new integrated method for tissue extracellular vesicle enrichment and proteome profiling
Source: Royal Society of Chemistry journal article supplement (doi:10.1039/d2ra06185f), 2022-01-01

Figure 2F

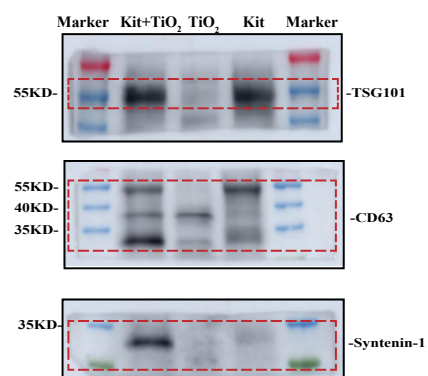

Figure 2G

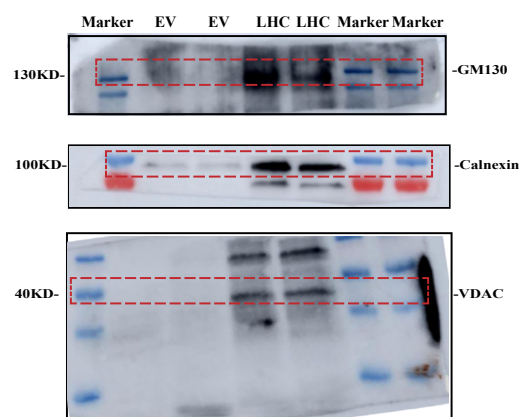

Figure 3A

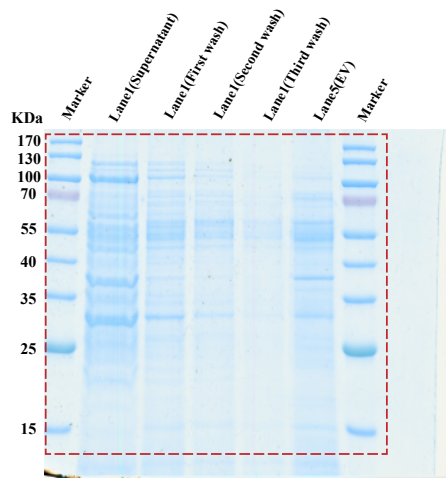

Figure 3B

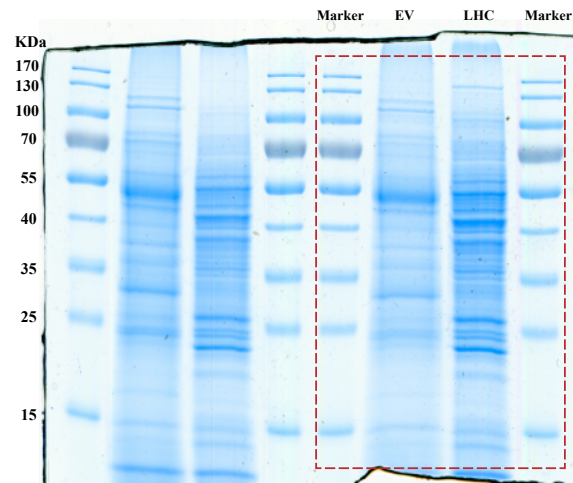

**Figure 4A**

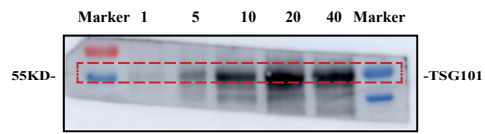

**Figure 4B**

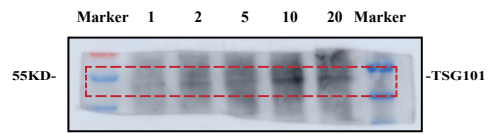

Figure S1

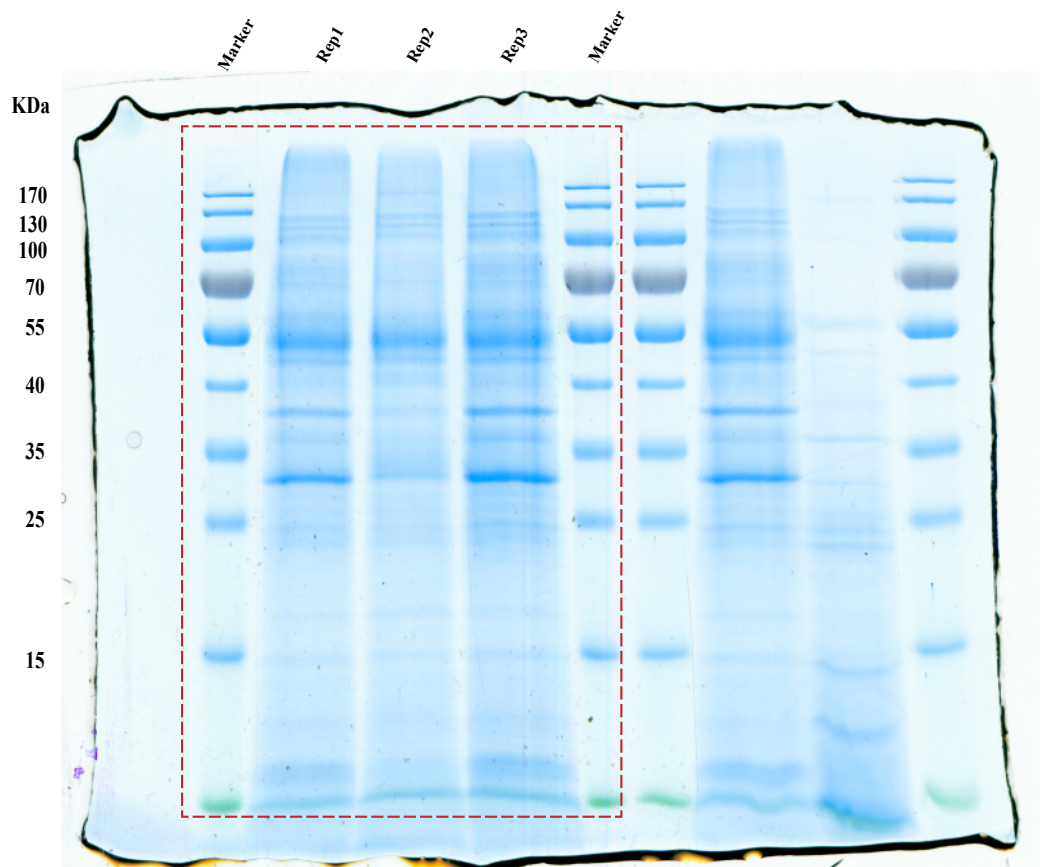

Supplement: d2ra06185f1.pdf [file d2ra06185f1.pdf]
